# Supplementary material for: The Voltage-Gated Sodium Channel Beta4 Subunit Maintains Epithelial Phenotype in Mammary Cells
Source: MDPI journal article supplement (doi:10.3390/cells10071624), 2021-06-29
Supplement: s1 [file s1]

Supplementary Table I: PCR primers used

| <b>Genes</b>  | <b>Proteins</b> | <b>Forward primer<br/>(5'→3')</b> | <b>Reverse primer<br/>(5' →3')</b> | <b>Efficiencies</b> | <b>Expected<br/>size (pb)</b> |
|---------------|-----------------|-----------------------------------|------------------------------------|---------------------|-------------------------------|
| <i>CTNNB1</i> | β-catenin       | CCCACTAATGTCCAGCGTTT              | GCATGATAGCGTGTCTGGAA               | 2.00                | 214                           |
| <i>CDH1</i>   | E-cadherin      | CGACCCAACCCAAGAATCTA              | GGCTGTGCCTTCCTACAGAC               | 2.03                | 171                           |
| <i>CDH2</i>   | N-cadherin      | GGTGGAGGAGAAGAAGACCAG             | GGCATCAGGCTCCACAGT                 | 2.09                | 72                            |
| <i>SNAIL</i>  | Snail           | GGTTCTTCTGCGCTACTGCT              | TAGGGCTGCTGGAAGGTAAA               | 2.00                | 157                           |
| <i>SNAIL2</i> | Slug            | GAGCATTTGCAGACAGGTCA              | GCTTCGGAGTGAAGAAATGC               | 2.10                | 200                           |
| <i>TWIST1</i> | Twist1          | CCACTGAAAGGAAAGGCATC              | GCATTTTACCATGGGTCTC                | 2.01                | 229                           |
| <i>ZEB1</i>   | Zeb1            | GCACCTGAAGAGGACCAGAG              | GTGTAAGTGCACAGGGAGCA               | 2.08                | 200                           |
| <i>VIM</i>    | Vimentin        | GTTTCCAAGCCTGACCTCAC              | TTCCAGGGACTCATTGGTTC               | 1.99                | 246                           |
| <i>ACTA2</i>  | α-SMA           | ACCCGATAGAACATGGCATC              | CATACATGGCTGGGACATTG               | 2.03                | 195                           |
| <i>SCN5A</i>  | Nav1.5          | CACGCGTTCACTTTCCTTC               | CACGCGTTCACTTTCCTTC                | 2.00                | 208                           |
| <i>HPRT1</i>  | Hprt1           | TTGCTGACCTGCTGGATTAC              | TATGTCCCCTGTTGACTGGT               | 2.00                | 119                           |
