# Supplementary material for: The Voltage-Gated Sodium Channel Beta4 Subunit Maintains Epithelial Phenotype in Mammary Cells
Source: MDPI journal article supplement (doi:10.3390/cells10071624), 2021-06-29
Supplement: s1 [file s1]

Supplementary Figure 1

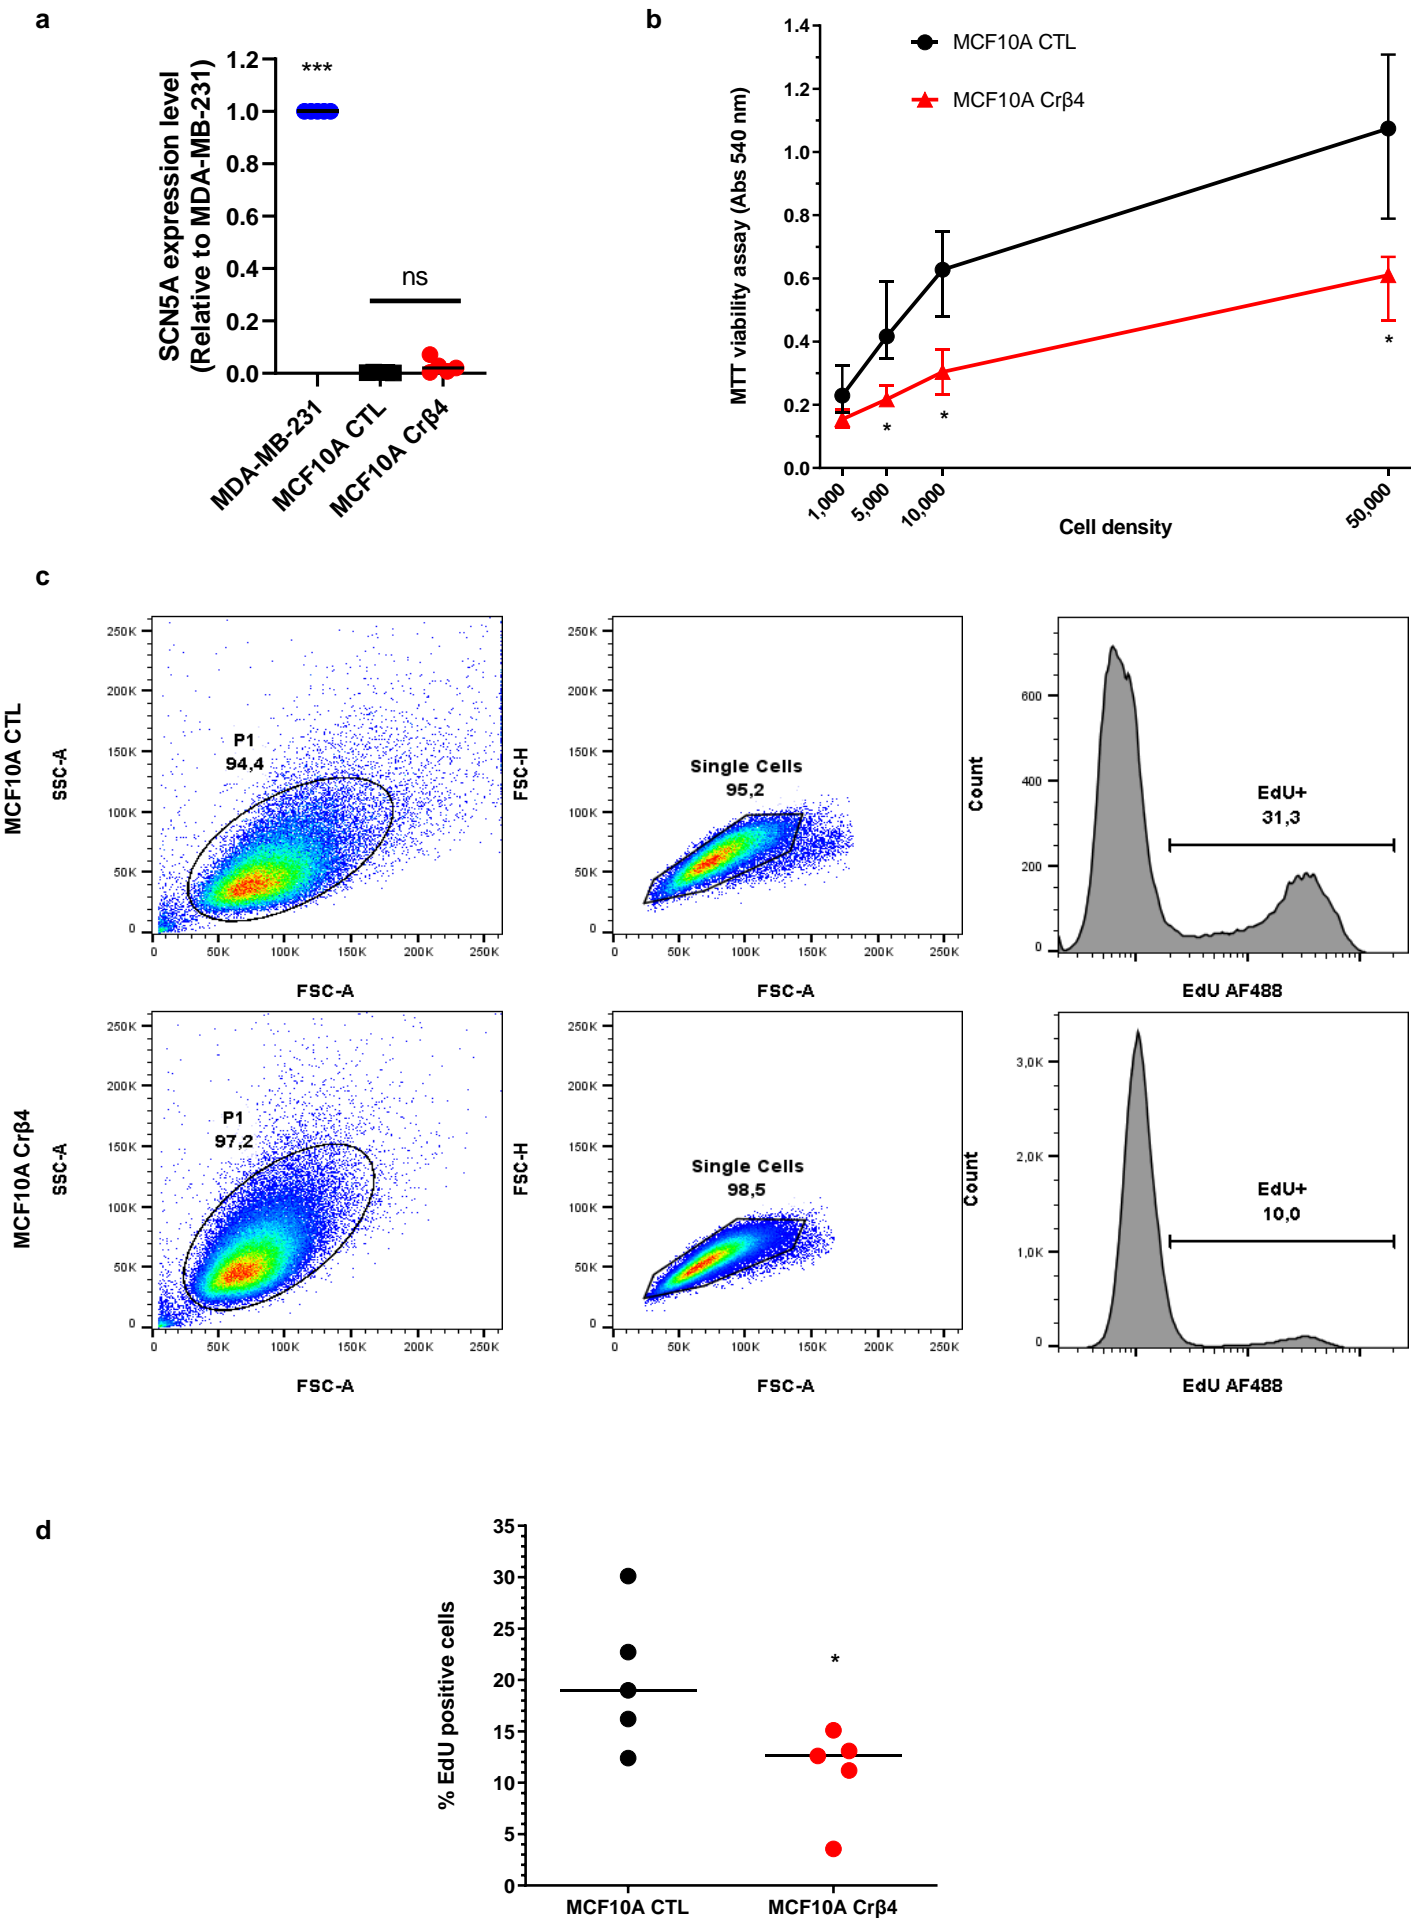

Supplementary Figure 2  
a) Uncropped blots shown in figure 1a

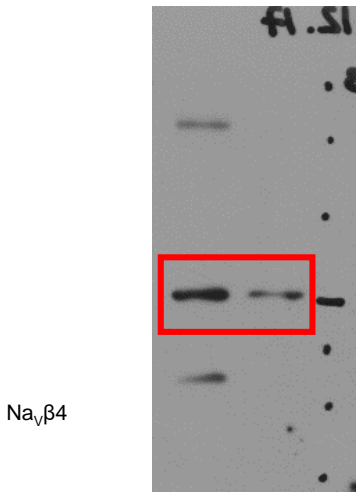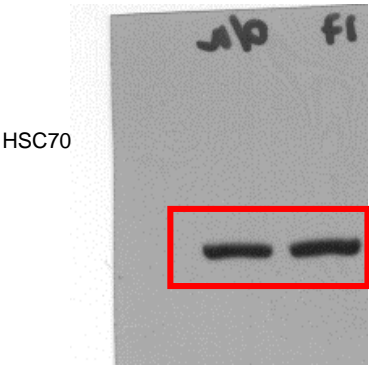

b) Uncropped blots shown in figure 1b

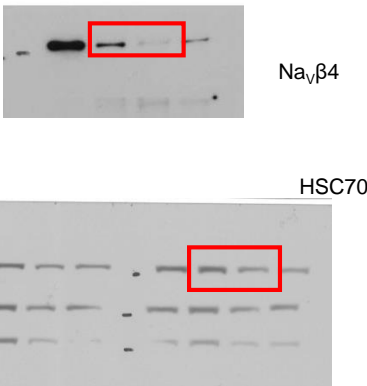

c) Uncropped blots shown in figure 3c

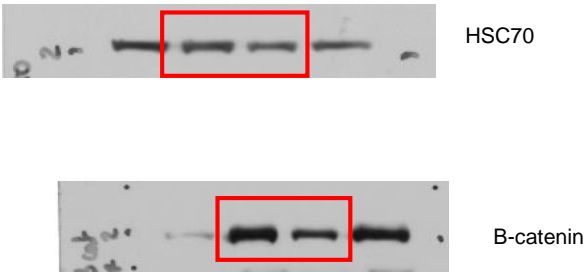

d) Uncropped blots shown in figure 3d

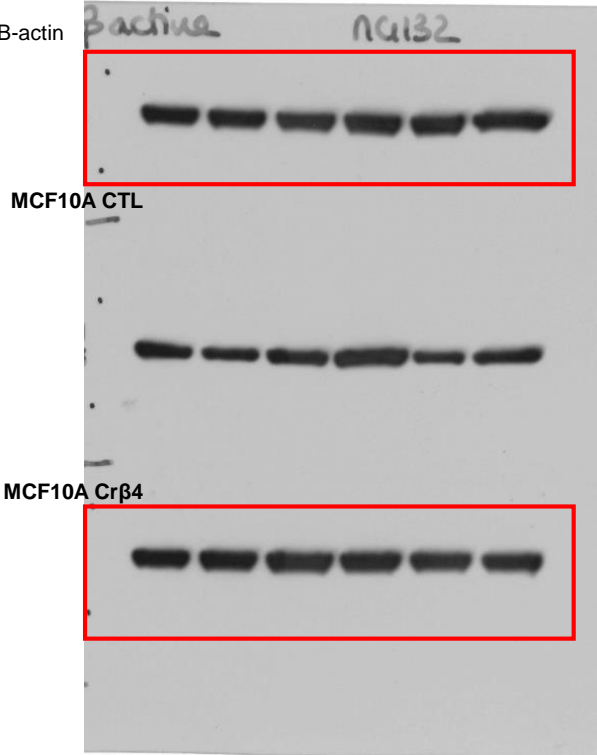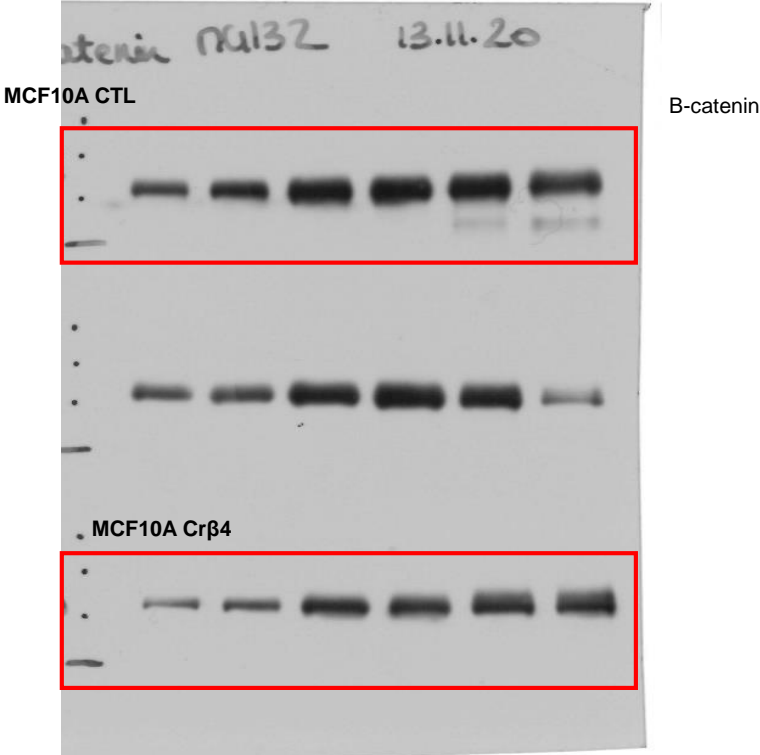

e) Uncropped blots shown in figure 3f

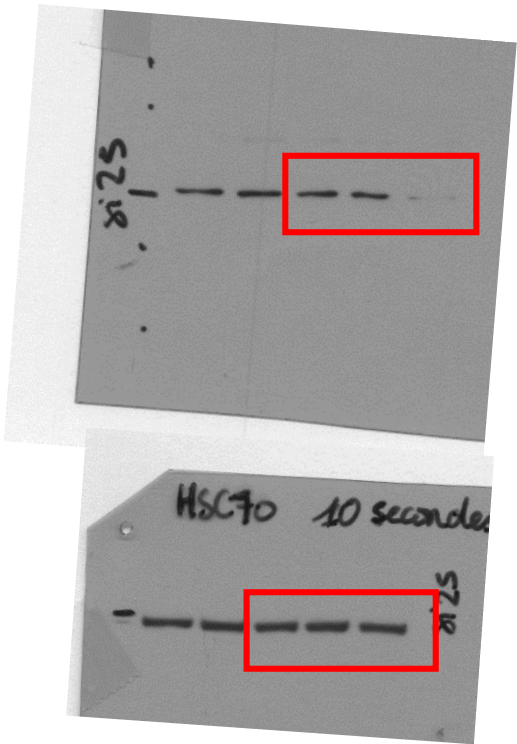

f) Uncropped blots shown in figure 3g

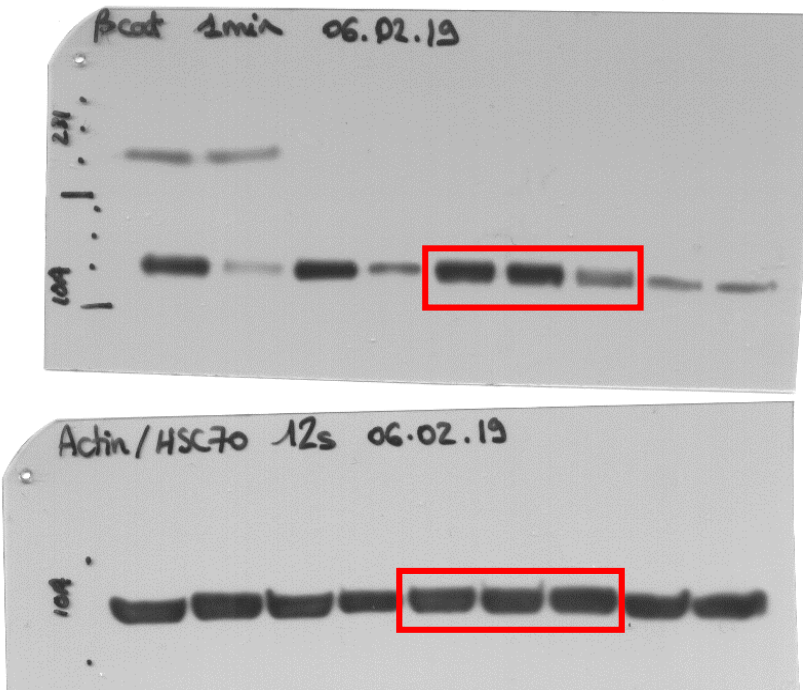

g) Uncropped blots shown in figure 3h

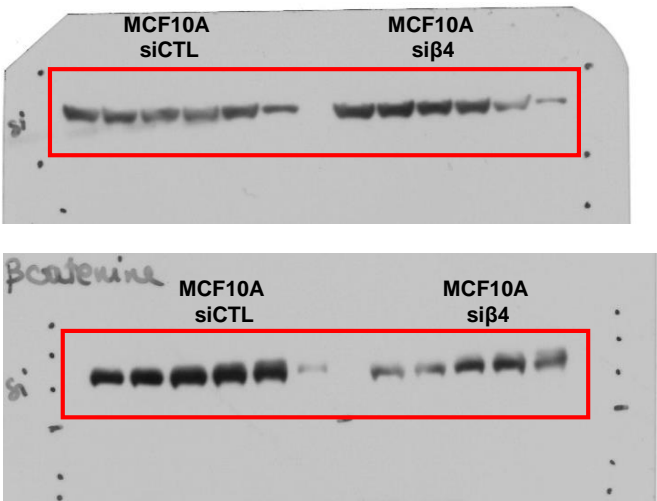

h) Uncropped blots shown in figure 4b

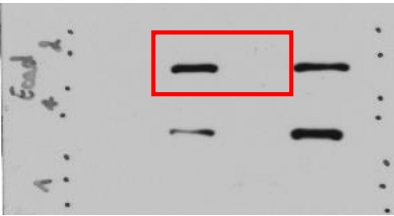

E-cadherin

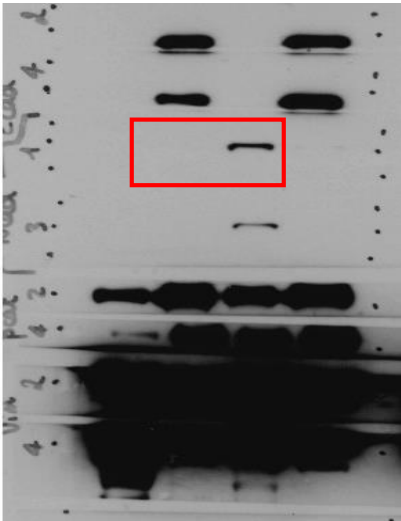

N-cadherin

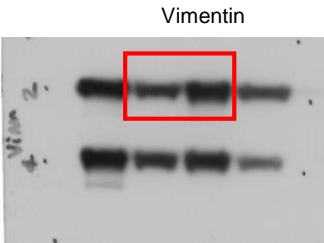

Vimentin

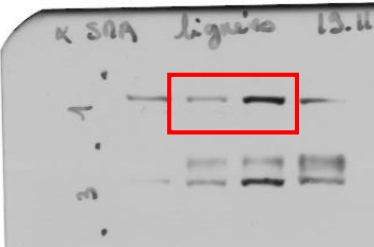

$\alpha$ SMA

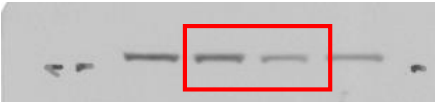

HSC70

h) Uncropped blots shown in figure 4c

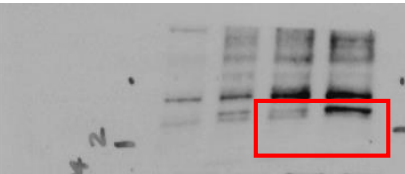

Na<sub>v</sub>β4

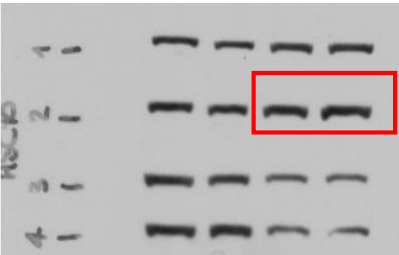

HSC70
