# Supplementary material for: The Voltage-Gated Sodium Channel Beta4 Subunit Maintains Epithelial Phenotype in Mammary Cells
Source: Cells. 2021 Jun 29;10(7):1624. doi: 10.3390/cells10071624 (PMC8304757; doi:10.3390/cells10071624)
Supplement: Supplementary file 1 [file cells-10-01624-s001.zip]

Archive with 4 entries (4 files):
- Doray et al, Supplementary figures new.pdf
- Doray et al, Supplementary materials new.pdf
- Doray et al., Suppl. table I new.pdf
- Doray et al., Supplementary figure legends_revised.pdf
